# Supplementary material for: Characterizing the Inflammatory Profile of Neutrophil-Rich Triple-Negative Breast Cancer
Source: MDPI journal article supplement (doi:10.3390/cancers16040747), 2024-02-10
Supplement: s1 [file s1]

# Co-Culture\_Western Blot\_CD11b

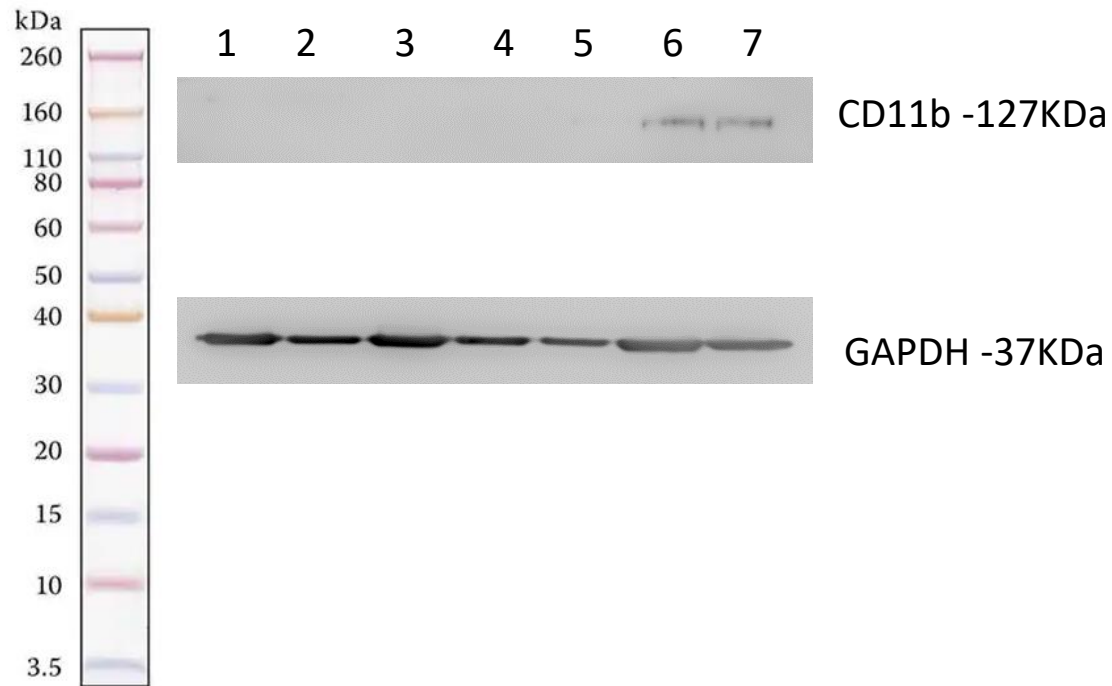

Lane 1 : MCF control

Lane 2 : MDA control

Lane 3 : MCF+dHL60

Lane 4 : MDA+dHL60

Lane 5 : dHL60 control

Lane 6 : dHL60+MCF

Lane 7 : dHL60+ MDA

Note: There was a faint band in dHL60 control but not visible in image

# Co-Culture\_Western Blot\_CD11b

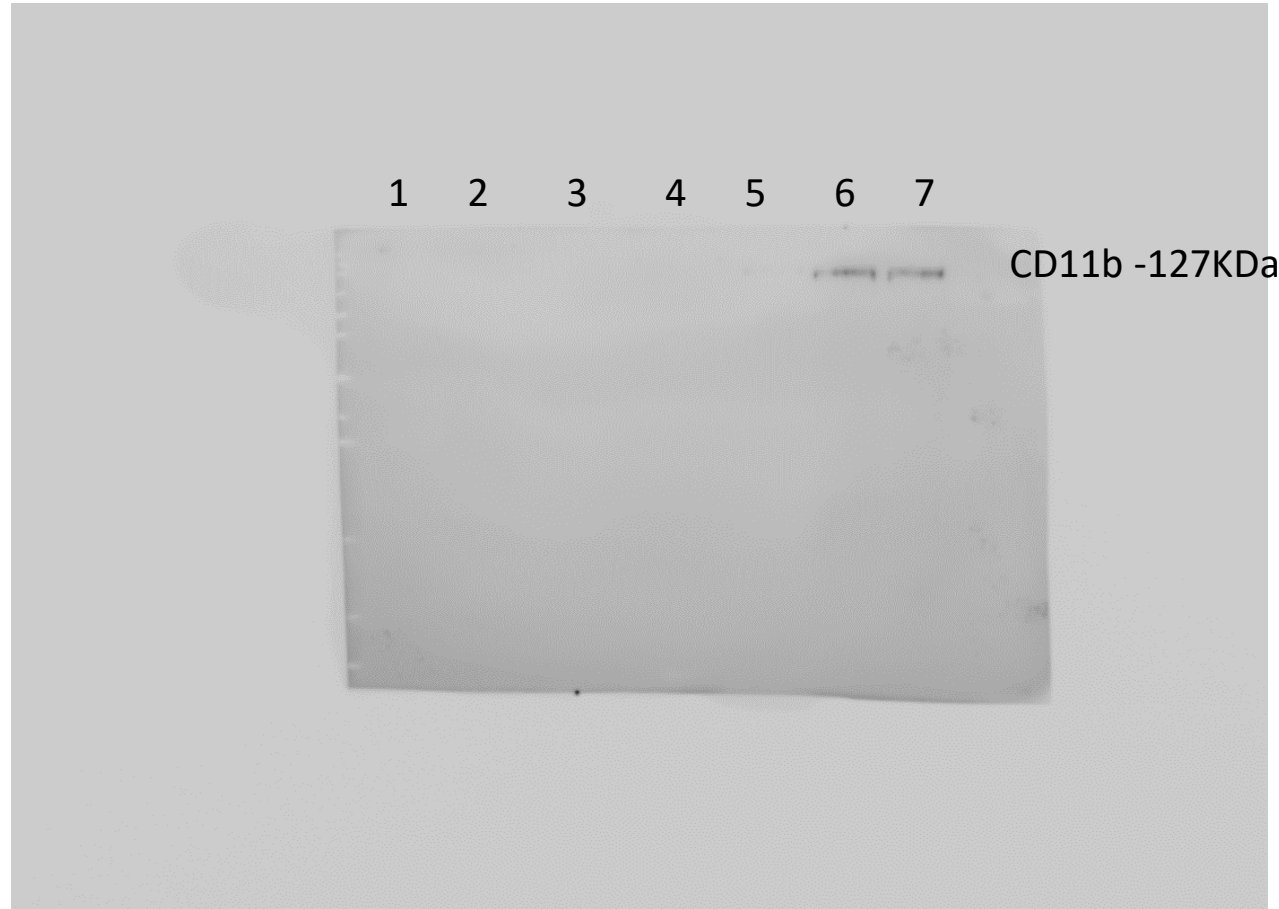

Lane 1 : MCF control

Lane 2 : MDA control

Lane 3 : MCF+dHL60

Lane 4 : MDA+dHL60

Lane 5 : dHL60 control

Lane 6 : dHL60+MCF

Lane 7 : dHL60+ MDA

Note: There was a faint band in dHL60 control but not visible in image

# Co-Culture\_Western Blot\_CD11b

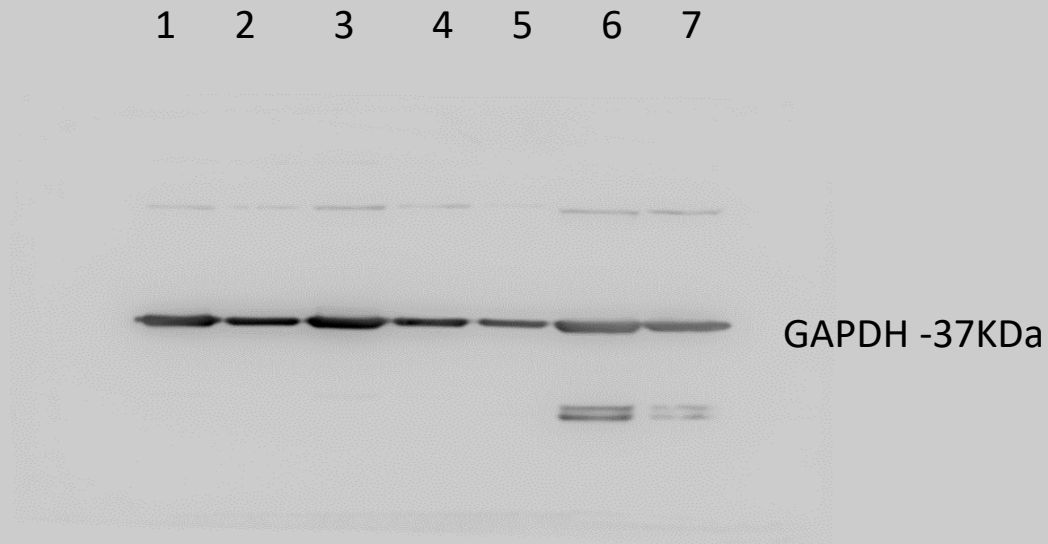

Lane 1 : MCF control

Lane 2 : MDA control

Lane 3 : MCF+dHL60

Lane 4 : MDA+dHL60

Lane 5 : dHL60 control

Lane 6 : dHL60+MCF

Lane 7 : dHL60+ MDA

Note: There was a faint band in dHL60 control but not visible in image
